# Supplementary material
Source: publisher site journal article supplement (https://neobiota.pensoft.net/article/46699/download/suppl/33/)
Supplement: Supplementary file 1

## Sheet: Distribution of haplotypes
Supplementary Table 3. The distribution of recognized haplotypes (concatenated 16S and COI sequences). For details about 16S and COI haplotypes see Supplementary table 1.
						16S+COI haplotypes
Station code	Region	River	Locality	Country	Date	H 1	H 2	H 3	H 4	H 5	H 6	H 7	H 8	H 9	H 10	H 11	H 12	H 13	H 14	H 15	H 16	H 17	H 18	H 19	H 20	H 21	H 22	H 23	H 24	H 25	H 26	H 27	H 28	H 29	H 30	H 31	H 32	H 33	H 34	H 35	H 36	H 37	H 38	H39	sum of indivduals
1	Native	Durugol liman		Turkey	01.09.2007	10	1	3	1	1	1	1	1	1	1	1	1																												23
2		Danube	Orjachovo/Bechet	Romania/Bulgaria	2013-09-14																																							1	1
3	Native	Danube	Nufaru	Romania	2013-09-25																																							1	1
4	Native	Dniestrovskij Liman	Krasna Kosa	Ukraine	21.08.2009																																				8				8
5+5A	Native	Dniester	Mayaki	Ukraine	22.08.2009																	2	4					1													6	1			14
6		river near Orgiejow	Orgiejow	Moldova	10.08.2011																	5																							5
7+7A		Dniester	Jampol, above + below Rusava inflow	Ukraine	22.07.2011														4	1		8										1													14
8	Native	Akkarzhanka		Ukraine	22.08.2009															5			3			1	1																		10
9	Native	Dalnik	Mala Odina	Ukraine	22.08.2009															13			5	1	1																				20
10		Southern Bug		Ukraine	20.08.2009													1	9	1																									11
11+11A	Native	Stebleevsky Liman+Dnieprovski Liman		Ukraine	17.08.2009													1	1	1	1	19																							23
12	Native	North Crimean canal	Stavky	Ukraine	11.07.2011																																				1		9		10
13	Native		Kerch peninsula, Frontove	Ukraine	10.07.2011													5	7	6	3																								21
14	Native	Dnieper	Chortyca island near Zaporozhye	Ukraine	14.08.2009														2	3									1																6
15	Native	Saksahan	near village Saksahan	Ukraine	13.08.2009														8	1																									9
16+16A	Native	Dnieper	Dniepropietrovsk, Gribnoi kanal+Samarski Zaliv	Ukraine	2006														1			3								1															5
17	Native	Dniepr-Donbas channel	Chervona Dolyna	Ukraine	04.07.2011														4			2																							6
18	Native	Krasnopavlivski zaliv		Ukraine	05.07.2011														6			4									1														11
19	Native	Doniec	Starodubivka	Ukraine	05.07.2011														6	9		2																							17
20+20A	Central corridor	Kievski Reservoir	Strakholissia	Ukraine	11.08.2009																	4																							4
21	Central corridor		channel in Duboy	Belarus	28.06.2010														2			7											1												10
22+22A	Central corridor	Bug	Pratulin	Poland	21.04.2004														2	1		2																							5
23	Central corridor	Bug	Tonkiele	Poland	21.04.2004														4			5												1											10
24	Central corridor	Bug	Barcice	Poland	03.09.2003														3	1		2												1											7
25+25A	Central corridor	Vistula	Łążek + Połaniec-Winnica	Poland	04.10.2002														1			15												1											17
26	Central corridor	Vistula	Świerże Górne	Poland	03.10.2002																	8										1			1										10
27	Central corridor	Vistula	Witoszyn	Poland	20.06.2000													1	2			2																							5
28+28A+28B	Central corridor	Vistula lagoon	Nadbrzeże+Kąty Rybackie+Tolkmicko	Poland	12.10.2002														2	2		10																							14
29	Central corridor	canal between Łuknajno and Śniardwy lakes		Poland	11.09.2002														4			3																							7
30	Central corridor	Warta	Nowiny Wielkie	Poland	08.05.2001														3	2		4																							9
31+31A	Central corridor	Oder	Czelin + Porzecze	Poland	08.05.2001														3	1		12										1			1	1									19
32+32A	Central corridor	Oder	Pławidło	Poland	09.05.2001														1			11																							12
33	Central corridor	Mittellandkanal	Handensleben	Germany	09.06.2010														1			1																							2
34	Central corridor	Mittellandkanal	Horstel	Germany	10.06.2010														2																										2
35	Southern corridor	Starnbergersee		Germany	23.05.2011														20																										20
36	Southern corridor	Traunsee		Austria	25.05.2011																																21								21
37+37A	Southern corridor	Danube	dam below + above Vienna	Austria	2005														2																		1								3
38+38A	Southern corridor	Danube	Nagymaros	Hungary	12.03.2011														1																		3								4
39	Southern corridor	Balaton	Tihany	Hungary	26.08.2006														18																		1								19
40+40A	Northern corridor	Moskva	Moskva	Russia	NA																																	2	6	1					9
41	UK	Great Ouse	Harrold Bridge	United Kingdom	2014																	9																							9
				sum of indivduals		10	1	3	1	1	1	1	1	1	1	1	1	8	119	47	4	140	12	1	1	1	1	1	1	1	1	3	1	3	2	1	26	2	6	1	15	1	9	2
